# Supplementary material for: Bridging the gap: Using reservoir ecology and human serosurveys to estimate Lassa virus spillover in West Africa
Source: PubMed Central journal article supplement (PMC7959400; doi:10.1371/journal.pcbi.1008811), 2021-03-03
Supplement: pcbi.1008811.s004.pdf [file pcbi.1008811.s004.pdf]

1 Dear Dr. Amy Wesolowski and Dr. Nina Fefferman,

2  
3 We are once again grateful for the helpful suggestions for improving our manuscript and for the opportunity to further revise our submission. All revisions to the datasets and code have been pushed to GitHub in  
4 the “rev2” branch of the [pathogen-spillover-forecast](#) repository [1]. Please note that we’ve slightly modified  
5 the title of our manuscript to “Bridging the gap: Using reservoir ecology and human serosurveys to estimate  
6 Lassa spillover in West Africa.” In previous versions, the word “incidence” was used instead of “spillover.”  
7 We feel that this change more accurately describes the estimates that our model produces.

8  
9 We begin by addressing a key issue brought up in this most recent round of review. Next, we reply to  
10 the remaining comments that were emphasized by both the reviewer and editors. Then, we discuss changes  
11 made to the dataset. Finally, we address any remaining line-by-line comments of the reviewer.

12 A key concern raised in this round of review was the magnitude of our estimates for the annual number  
13 of human LASV infections. It is our belief that estimates of the total number of LASV infections in humans  
14 of West Africa may be much larger than conventional wisdom because 1) the health infrastructure necessary  
15 to diagnose Lassa Fever is lacking in much of West Africa, and 2) longitudinal seroconversion studies have  
16 suggested that the vast majority of all LASV infections are asymptomatic or mild, and 3) LASV reinfection  
17 may be a common phenomenon [2]. Because of this belief, we have incorporated Reviewer 1’s helpful  
18 suggestion that we refer to our annual estimates as “LASV infections,” rather than cases, which might imply  
19 LASV infection with symptoms. Our goal for this manuscript was to derive estimates of the number of  
20 human infections using data that describes the ultimate source of infection (i.e., LASV in *M. natalensis*),  
21 rather than being guided by reports of hospital records that are biased toward cases of Lassa Fever with  
22 severe symptoms. Although our estimates exceed some conventional annual LASV infection estimates, they  
23 are in line with another well-cited study that broadly estimates the number of LASV cases based on similar  
24 human serology data [3]. We’ve added this citation to the discussion (line 463) to help validate our estimates.

## 25 REVIEWER COMMENTS THAT WERE EMPHASIZED BY THE EDITOR

26 **Comment:** Address the use of SIRS dynamics over SIR

27 **Response:** Both the reviewer and editors critiqued our emphasis of the SIRS vs SIR models in the  
28 manuscript. We presented the SIRS model in the main text because 1) some studies suggest seroreversion  
29 occurs; and 2) the SIRS model is the more general model. Specifically, the model equations, as well as the  
30 equations derived throughout the Methods section, represent the SIR model when  $\lambda = 0$ . We feel it would  
31 be redundant to present these equations in the main text with  $\lambda = 0$ , and again in the supplemental with  
32  $\lambda \neq 0$ . To help reduce emphasis on the SIRS dynamics, we changed text that referred to “SIRS model” in  
33 the following places:

- 34 • line 200: we changed “SIRS model” to “epidemiological model”
- 35 • line 277: we changed “SIRS model” to “an epidemiological model, based on the classic  
36 susceptible-infected-recovered framework,...”
- 37 • Figure 2: we changed “SIRS model” to “Epidemiological model”

38 \* \* \*

39 **Comment:** Address the possibility of using age-seroprevalence data. Reviewer 1 states that “The authors  
40 note in their response that cell-mediated immunity is known to play a role in LASV response in humans

41 and that Abs wane with time—this may be true, but those dynamics are still not SIRS. If humans remain  
 42 immune but seronegative, they should move into a different class that is Ab negative but certainly not  
 43 susceptible; these dynamics could be modeled, and I’ll emphasize again that information on the age  
 44 structure of the serological response would be helpful in assessing this.”

45 **Response:** We investigated the idea proposed by the reviewer and found that this addition does not  
 46 change the LASV human infection estimates provided by our framework. Let  $C$  denote the class of  
 47 individuals that maintain immunity to LASV after losing detectable levels of antibodies. A model that is  
 48 consistent with the reviewer’s suggestion is

$$\begin{aligned}\frac{dS}{dt} &= b - dS - FS + \lambda(1 - \alpha)R, \\ \frac{dI}{dt} &= FS - dI - \gamma I, \\ \frac{dR}{dt} &= \gamma(1 - \mu)I - dR - \lambda R \\ \frac{dC}{dt} &= \alpha\lambda R - dC.\end{aligned}\tag{1}$$

49 In the above model, a fraction  $\alpha$  of individuals that lose detectable antibodies transition into class  $C$ , and a  
 50 fraction  $1 - \alpha$  transition into the susceptible class.

51 In direct analogy with what is presented in the main text, steady-state analysis of System (1) can be used  
 52 to estimate the annual number of LASV infections (i.e., the term  $FS^*$ ) that are implied by a given  
 53 seroprevalence. We’ve added these calculations in the Mathematica document and pdf output contained in  
 54 the “Human LASV Incidence” subdirectory of the repository (section entitled “Model of Human LASV  
 55 spillover with undetectable immune class”). The final expression for  $FS^*$  is unchanged from what we have  
 56 in the main text (i.e.,  $\alpha$  does not influence the LASV case estimates). This occurs because our estimates  
 57 are based on the number of annual cases (i.e.,  $FS^*$ ) that are implied by the predicted seroprevalence in a  
 58 region. In our equations, it is true that increasing  $\alpha$  decreases the number of humans that are susceptible  
 59 ( $S$ ) to LASV in a population. However, our estimation framework then predicts a higher force of infection  
 60  $F$  in order to compensate for this decrease in  $FS^*$ .

61 We agree that using age-seroprevalence data to assess different human epidemiological model structures is  
 62 a relevant and fascinating project. At the same time, however, we feel that this analysis deserves its own  
 63 manuscript. The current human model 1) provides the simplest connection from environmental risk to  
 64 observed human seroprevalence, 2) is not limited to those serosurveys that report age-seroprevalence data,  
 65 and 3) can be improved upon in future work.

## 66 MODIFICATIONS TO THE LASSA VIRUS DATASET

67 Reviewer 1 commented that some absences in our rodent LASV dataset might only be due to sampling  
 68 having occurred in a season when LASV prevalence is low, and requested that sampling-date information  
 69 be available in the dataset. This is a fair point, and we have taken steps to provide information on when  
 70 rodent sampling took place for each entry in the clean LASV dataset, in those cases where this information  
 71 is provided by the primary literature source. Specifically, we’ve added a column, “Survey Dates”, that  
 72 describes the years and months of rodent sampling. When year-month is not available in the literature  
 73 source, we included the season (wet or dry) and year of sampling.

74 In addition to this change, we made other small corrections to the dataset that resulted in 4 fewer absences.  
 75 First, we added seroprevalence data from Coulibaly, N’Golo (2009), which had previously been overlooked.  
 76 Previously, only the PCR testing data in Coulibaly, N’Golo (2009) were included in the dataset. The

77 addition of immunity data changed 3 sites that were previously classified as absences into ambiguous sites.  
78 Finally, we reorganized entries of trapping data from the manuscripts Lecompte, Fichet-Calvet (2006) and  
79 Fichet-Calvet, Becker-Ziaja (2014). These studies report PCR and serology tests, respectively, on the same  
80 group of rodents. As such, the data from these papers is best organized into a single row for each site. This  
81 change brought to light a sampled site, Kodoko, that was being double counted in our dataset. These  
82 changes did not have a substantial impact on the resulting models or LASV infection estimates.

## 83 REVIEWER 1

### 84 1.1 Major Comments

85 **Comment:** Lack of seasonality included in either the reservoir or pathogen layer: point taken that  
86 dynamics are assessed over long timescales and that spatial, environmental factors are accounted for.  
87 However, given the sparseness of the data for some of these localities, as well as the short lifespan of the  
88 rodent hosts (meaning Ab+ data may be difficult to acquire), I still think it is possible that a few rodents  
89 are sampled at the wrong time of year to get a false negative LASV pixel result for a given region. Along  
90 these lines, do you really think 5 Ab negative rodents is enough to conclude that a site is LASV(-)? My  
91 understanding is that the average lifespan of *M. natalensis* is only 6 months, so I would not be surprised at  
92 all to find 5 seronegative individuals in a site where Lassa really does occur. Can you provide a baseline  
93 seroprevalence in rodents of a LASV(+) site for comparison?

94 **Response:** Across the sites that are 1) deemed LASV+ by our definition, and 2) have seroprevalence data  
95 in rodents, the average seroprevalence is 24%. That said, we agree that there might be some false-negatives  
96 present in our dataset. However, because we bootstrap our model fitting procedure, we encourage the  
97 LASV sub-model to learn robust patterns that are not dependent on absences or presences within any  
98 particular region. Consequently, the LASV layer can still learn general trends in overall LASV prevalence  
99 so long as false negatives are not too prevalent. Ultimately, finding out the true distribution of LASV in  
100 rodents will require more longitudinal sampling effort.

101 Because of the reviewer's comments, we reran the full model with the minimum number of rodents required  
102 in the definition of a LASV-absence set to ten. This results in two fewer absences: one from Guinea, and  
103 one from Nigeria. All of the absences within central West Africa remain. Consequently, the general  
104 prediction of the model remains similar, with precipitation contingency being the primary driver of LASV  
105 distribution and the distribution of LASV concentrated in western and eastern West Africa. The additional  
106 simulations have been uploaded to GitHub.

107 \* \* \*

108 **Comment:** I like the Excel workbooks with the raw data added to the Github repository, but neither the  
109 *M. natalensis* nor the Lassa tables report month or season of each data point. If these data exist, they  
110 should be reported and, ideally, included in the regression model for the reservoir and pathogen layers. At  
111 a very minimum, I would like the authors summarize the seasonality of input data in some way to show  
112 that there is not some glaring inconsistency whereby a rodent was never sampled at the time of year  
113 relevant for the disease in question in a particular area.

114 **Response:** We've incorporated the reviewer's suggested changes to the dataset. The table below  
115 summarizes the rodent surveys that define our absence sites. At least for many of the absences in central  
116 West Africa (e.g., Ghana, Ivory Coast), surveying was conducted in the wet season (roughly April -  
117 October) when LASV prevalence is believed to peak [4]. Other absences do not have as thorough of

118 sampling. However, we keep these in the dataset because they accurately portray what is currently known  
 119 about LASV prevalence in rodents for those regions, and because our bootstrapping procedure encourages  
 120 our model to learn robust relationships that do not depend heavily on specific rodent surveys.

| Country      | Survey Dates                                                                            | # Tested Ab | #Tested Virus | Reference |
|--------------|-----------------------------------------------------------------------------------------|-------------|---------------|-----------|
| Ghana        | 2010: wet; 2011: wet                                                                    | 0           | 33            | [5]       |
| Ghana        | 2010: wet; 2011: wet                                                                    | 0           | 59            | [5]       |
| Ghana        | 2010: wet; 2011: wet                                                                    | 0           | 14            | [5]       |
| Ghana        | 2010: wet; 2011: wet                                                                    | 0           | 10            | [5]       |
| Ghana        | 2010: wet; 2011: wet                                                                    | 0           | 32            | [5]       |
| Ghana        | 2010: wet; 2011: wet                                                                    | 0           | 40            | [5]       |
| Ghana        | 2010: wet; 2011: wet                                                                    | 0           | 17            | [5]       |
| Guinea       | 2004: February                                                                          | 24          | 24            | [6]       |
| Guinea       | 2004: February                                                                          | 70          | 70            | [6]       |
| Guinea       | 2003: May, October                                                                      | 11          | 11            | [6, 7]    |
| Guinea       | 2004: February                                                                          | 9           | 9             | [6]       |
| Guinea       | 2004: January                                                                           | 14          | 14            | [6]       |
| Guinea       | 2005: February                                                                          | 0           | 35            | [6]       |
| Ivory Coast  | 2003: December; 2004: March, November, December; 2005: March, August, October, November | 97          | 97            | [8]       |
| Ivory Coast  | 2003: December; 2004: March, November, December; 2005: March, August, October, November | 164         | 164           | [8]       |
| Ivory Coast  | 2003: December; 2004: March, November, December; 2005: March, August, October, November | 12          | 12            | [8]       |
| Mali         | 2004: February                                                                          | 39          | 0             | [7]       |
| Mali         | 2009: June                                                                              | 0           | 17            | [9]       |
| Mali         | 2009: June                                                                              | 0           | 40            | [9]       |
| Mali         | 2011: October                                                                           | 22          | 22            | [10]      |
| Mali         | 2011: October                                                                           | 11          | 11            | [10]      |
| Mali         | 2012: March                                                                             | 11          | 11            | [10]      |
| Mali         | 2012: March                                                                             | 33          | 34            | [10]      |
| Nigeria      | 2012: March                                                                             | 7           | 7             | [11]      |
| Nigeria      | 2011: January                                                                           | 13          | 13            | [11]      |
| Nigeria      | 2011: dry, wet; 2012: dry, wet                                                          | 34          | 34            | [11]      |
| Sierra Leone | NA                                                                                      | 19          | 8             | [2]       |

Table 1: The column “Survey Dates” indicates when rodent sampling took place. The format is “Year1: month1, month2, etc; Year2: month1, month2, etc. ” In some primary sources, only season (wet or dry) was provided. NA indicates that no time-of-sampling information was provided by the original publication.

121 \* \* \*

122 **Comment:** Concern over the emphasis on SIRS dynamics over SIR with very little support for this  
 123 decision. The authors attempt to address these concerns, and in fact, they do a decent job of emphasizing  
 124 that support is fairly weak for SIRS assumptions in the results and discussion; however, the methods are  
 125 still entirely focused on an SIRS approach and now inconsistent with the rest of the paper. This  
 126 discrepancy needs to be addressed – see specific line by line comments below.

127 **Response:** Addressed at the top of this document and in line by line comments below.

128 \* \* \*

129 **Comment:** Additionally, the authors note in their response that cell-mediated immunity is known to play  
 130 a role in LASV response in humans and that Abs wane with time—this may be true, but those dynamics  
 131 are still not SIRS. If humans remain immune but seronegative, they should move into a different class that  
 132 is Ab negative but certainly not susceptible; these dynamics could be modeled, and I’ll emphasize again  
 133 that information on the age structure of the serological response would be helpful in assessing this.

134 **Response:** Addressed at the top of this document.

135

\* \* \*

136 **Comment:** One other point that I noted on my re-read was that the authors spend a lot of time at the  
137 end of the paper predicting annual “cases” (e.g. Fig 6). Perhaps I’ve become too steeped in this difference  
138 from COVID, but I would advocate for changing the terminology to “infections” rather than “cases” which  
139 to me, implies symptoms.

140 **Response:** This is an excellent point and we have incorporated this suggestion.

## 141 1.2 Abstract

142 **Comment:** No need to address this in the abstract necessarily, but you mention ‘West Africa’ throughout  
143 the manuscript and show a map of the UN-defined region in all of your figures. It would be helpful to  
144 formally define this region (or cite a UN source) somewhere in the text so that the geographic extent of  
145 analysis does not seem arbitrary.

146 **Response:** We’ve added a citation of UN geographical regions (line 73) [12].

147

\* \* \*

148 **Comment:** Additionally, I think the 4 million (+) annual infections from the SIRS model is a fairly  
149 unreasonable projection, and I would suggest to leave this finding out of the abstract.

150 **Response:** We’ve removed reference of this number from the abstract.

## 151 1.3 Author Summary

152 **Comment:** Is Nigeria truly at risk for emergence of “new strains” of Lassa virus or just at risk for  
153 ‘emergence’? The authors do not report any evidence as to what genotypes to expect in one region vs.  
154 another.

155 **Response:** We’ve removed the reference to “new strains.”

## 156 1.4 Main paper

157 **Comment:** Lines 148-153: given the short lifespan of *M. natalensis* and the seasonal dynamics of Lassa, it  
158 seems that 5 seronegative rodents might be easy to acquire. What is the comparative seroprevalence in  
159 Lassa-positive regions?

160 **Response:** Addressed above.

161

\* \* \*

162 **Comment:** Line 163-167: It would be helpful to see a PRISMA diagram in the supplement that  
163 explains how you compiled your data for each layer: what terms were searched and surveys were excluded  
164 at each point in the analysis. You are very clear about the search terms used for the rodent infections—and  
165 you include the helpful Workbooks on Github—but less so here for the humans, and I can’t find the raw  
166 human data in the repository. What terms were searched and what serosurveys were excluded at each  
167 point in the analysis?

168 **Response:** Our Data section and Excel spreadsheets describe where our data sources come from and what  
169 data were included. The human dataset originates from the same searches as the rodent dataset. The  
170 search keywords were kept broad so as not to limit to one species or the other. This is specified at line 120  
171 and line 156.

172 The raw human data are in the same Excel document as all of the other Lassa data. Specifically, raw  
173 human data are those entries in the “Raw Lassa Literature” spreadsheet with Genus column equal to  
174 “Homo” and species column equal to “sapiens.” We’ve added text to the README file on GitHub to  
175 clarify this.

176 \* \* \*

177 **Comment:** Table 3: Edit % Pos. to % Seropositive. Edit table title to “serosurvey” instead of “survey”

178 **Response:** We’ve incorporated this suggestion.

179 \* \* \*

180 **Comment:** Line 201/Figure 2/Line 278: Why do we assume SIRS as default? In the Results, you report  
181 under SIR assumptions but not mention is made of this in the Methods.

182 **Response:** We do not mean to emphasize the SIRS dynamics nor claim that  $\lambda > 0$  with certainty. We  
183 present the SIRS model in the main text because the SIR model is a submodel of the SIRS model with  
184  $\lambda = 0$ . Explaining both models and count-derivations separately would be redundant. As stated at the top  
185 of this document, we’ve modified the wording to reduce the emphasis on SIRS dynamics at the locations  
186 pointed out in the reviewer’s comment.

187 \* \* \*

188 **Comment:** Line 307: Again, what about the alternative version in which immunity is maintained?

189 **Response:** An alternative version of our model is considered at the top of this document. We do not  
190 include this alternative version because it does not modify our estimates of human Lassa infection.  
191 In addition, we’ve moved the text that describes assumptions of LASV immunity into its own paragraph.  
192 In that paragraph (line 303), we mention that the duration of LASV immunity is not fully understood. We  
193 also explicitly mention that immunity is lifelong in the case that  $\lambda = 0$ .

194 \* \* \*

195 **Comment:** Also, as mentioned above transition to a cell-mediated immune class should not give an  
196 SIRS-like dynamic, as individuals who wane from the R class will not move back to S

197 **Response:** Addressed at the top of this document.

198 \* \* \*

199 **Comment:** Line 340: Again, you emphasize this rate of seroreversion extensively. I would suggest  
200 presenting the uncertainty in this rate—and the two different models derived from that uncertainty at the  
201 beginning of this methods section to make it clear that two possible outcomes (and a range in between  
202 them) are present.

203 **Response:** We feel that starting this subsection with an overview of what is known about LASV  
204 immunity in humans would feel out of order. The presentation of the epidemiological model is much more  
205 natural when the reader is walked through the state variables and processes that are associated with  
206 susceptible, infected, then recovered individuals. The point about seroreversion then naturally comes up  
207 when discussing the assumptions surrounding the recovered class. The uncertainty in the seroreversion rate  
208 parameter naturally comes up after the model equations, when the values for the model parameters are  
209 described (line 342). In that paragraph, we clearly present the two scenarios, lifelong immunity and waning  
210 immunity, that are being investigated.

211

\* \* \*

212 **Comment:** Line 372: As mentioned above, I would like to know if season of sampling for rodents  
213 influences the Lassa risk map.

214 **Response:** Addressed above.

215

\* \* \*

216 **Comment:** Why do you think Lassa is restricted in the west and east if not as a result of human density?  
217 Can you discuss this in the Discussion?

218 **Response:** This is an interesting but still unresolved question. Our machine learning framework suggests  
219 that the occurrence of LASV in rodents is most consistent with rainfall patterns like precipitation  
220 contingency. The central portion of West Africa has lower precipitation contingency than the at-risk  
221 regions of Nigeria, Sierra Leone, and Guinea, therefore the probability of LASV presence is also lower.  
222 We've added text at line 508 in the Discussion that mentions the possibility that LASV survives better  
223 outside of a host in wetter environments.

224

\* \* \*

225 **Comment:** Fig 4. What is shown on the x-axis? Probability of a given pixel being LASV (+)? If so, label  
226 as such.

227 **Response:** The x-axis of Figure 4 shows the combined risk layer, notated  $D_X$  in the manuscript. We  
228 changed the label to "Predicted Risk of Lassa ( $D_X$ )" to avoid confusion with the  $D_L$  risk layer that  
229 describes the probability that Lassa virus is in *M. natalensis*, given that the rodent is present.

230

\* \* \*

231 **Comment:** Fig 5. You only show serosurveys with pop sizes greater than 50 – why is this?

232 **Response:** The binomial regression weights each seroprevalence datapoint by the number of individuals  
233 tested in the serosurvey (line 275). We originally omitted the smaller serosurveys from the map in an  
234 attempt to make the residual datapoints easier to see and also because they contribute less to the  
235 coefficients estimated by the regression. We've revised the figure to include all serosurvey datapoints.

236

\* \* \*

237 **Comment:** According to Table 3, it looks like some of these surveys must have had very few individuals  
238 tested – how did you account for this in your model? This is not clear from the supplement or the main  
239 text.

240 **Response:** The reviewer is correct that sites differ in the number of individuals tested. In the  
241 quasi-binomial regression, each seroprevalence estimate is weighted by the number of individuals that were  
242 tested. This method of "weighting" data is standard practice in binomial-structured models of prevalence.  
243 As a result, serosurvey locations that tested more individuals have a greater effect on the coefficients  
244 estimated by the regression. This is mentioned at line 275 in the main text. To emphasize this point, we  
245 also added mention of it at lines 89 and 98 of the Appendix.

246 In the previous draft, the column "# Tested" in Table 3 showed the *average* number of individuals tested  
247 per site sampled in that row's publication. This was mentioned in the table caption, however we realize  
248 now it is confusing given the column header. We've changed this column to instead present the total  
249 number of individuals tested across all sites in the focal publication.

250

\* \* \*

251 **Comment:** Line 388: As mentioned above, I would suggest trading “cases” (implying symptomatic cases)  
252 with “infections” that might go unnoticed and explain some of these results. This terminology persists  
253 throughout the following paragraph

254 **Response:** We’ve incorporated this suggestion.

255

\* \* \*

256 **Comment:** Table 4: Suddenly, all assumptions here switch to SIR when previously the paper emphasized  
257 SIRS. This distinction needs to be clarified and consistent throughout. I would suggest presenting results  
258 for SIR assumptions only and then including SIRS results in the supplement

259 **Response:** Addressed at the top of this document.

260

## REFERENCES

261

1. Basinski AJ. Pathogen Spillover Forecast; 2020. Github repository

262

<https://github.com/54481andrew/pathogen-spillover-forecast.git>.

263

2. McCormick JB, Webb PA, Krebs JW, Johnson KM, Smith ES. A prospective study of the  
264 epidemiology and ecology of Lassa fever. *J Infect Dis.* 1987;155(3):437–444.

265

doi:10.1093/infdis/155.3.437.

266

3. Richmond JK, Baglole DJ. Lassa fever: epidemiology, clinical features, and social consequences.

267

*BMJ.* 2003;327(7426):1271–1275. doi:10.1136/bmj.327.7426.1271.

268

4. Fichet-Calvet E, Lecompte E, Koivogui L, Soropogui B, Doré A, Kourouma F, et al. Fluctuation of  
269 abundance and Lassa virus prevalence in *Mastomys natalensis* in Guinea, West Africa. *Vector Borne*

270

*Zoonotic Dis.* 2007;7(2):119–128. doi:10.1089/vbz.2006.0520.

271

5. Kronmann KC, Nimo-Paintsil S, Guirguis F, Kronmann LC, Bonney K, Obiri-Danso K, et al. Two  
272 novel arenaviruses detected in pygmy mice, Ghana. *Emerg Infect Dis.* 2013;19(11):1832.

273

doi:10.3201/eid1911.121491.

274

6. Lecompte E, Fichet-Calvet E, Daffis S, Koulémou K, Sylla O, Kourouma F, et al. *Mastomys*  
275 *natalensis* and lassa fever, West Africa. *Emerg Infect Dis.* 2006;12(12):1971.

276

doi:10.3201/eid1212.060812.

277

7. Fichet-Calvet E, Becker-Ziaja B, Koivogui L, Günther S. Lassa serology in natural populations of  
278 rodents and horizontal transmission. *Vector Borne Zoonotic Dis.* 2014;14(9):665–674.

279

doi:10.1089/vbz.2013.1484.

280

8. Coulibaly-N’Golo D, Allali B, Kouassi SK, Fichet-Calvet E, Becker-Ziaja B, Rieger T, et al. Novel  
281 arenavirus sequences in *Hylomyscus* sp. and *Mus (Nannomys) setulosus* from Côte d’Ivoire:

282

implications for evolution of arenaviruses in Africa. *PloS One.* 2011;6(6):e20893.

283

doi:10.1371/journal.pone.0020893.

284

9. Safronetz D, Lopez JE, Sogoba N, Traore SF, Raffel SJ, Fischer ER, et al. Detection of Lassa virus,  
285 Mali. *Emerg Infect Dis.* 2010;16(7):1123. doi:10.3201/eid1607.100146.

- 286 10. Safronetz D, Sogoba N, Lopez JE, Maiga O, Dahlstrom E, Zivcec M, et al. Geographic distribution  
287 and genetic characterization of Lassa virus in sub-Saharan Mali. *PLoS Negl Trop Dis*. 2013;7(12).  
288 doi:10.1371/journal.pntd.0002582.
- 289 11. Olayemi A, Obadare A, Oyeyiola A, Fasogbon S, Igbokwe J, Igbahenah F, et al. Small mammal  
290 diversity and dynamics within Nigeria, with emphasis on reservoirs of the Lassa virus. *System*  
291 *Biodivers*. 2018;16(2):118–127. doi:10.1080/14772000.2017.1358220.
- 292 12. United Nations. Geographical Regions; 2020.  
293 <https://unstats.un.org/unsd/methodology/m49/#geo-regions>.
